# Supplementary material for: A heterotrimetallic 3d–3d′–4f single chain magnet constructed from anisotropic high-spin 3d–4f nodes and paramagnetic spacers
Source: Royal Society of Chemistry journal article supplement (doi:10.1039/b925636a), 2010-01-01
Supplement: b925636a.pdf [file b925636a.pdf]

## ELECTRONIC SUPPLEMENTARY INFORMATION

a.

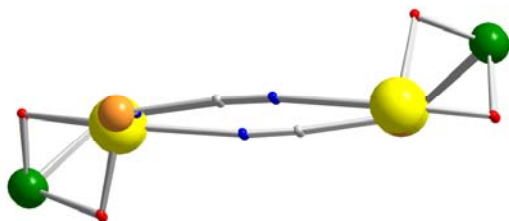

b.

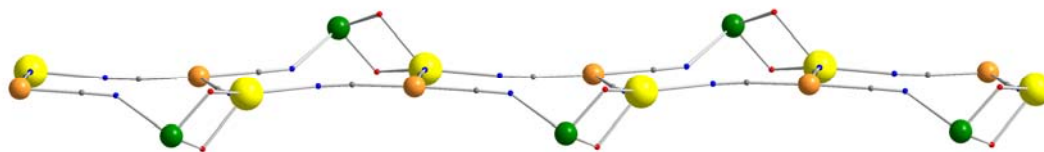

**Figure S1.** Front (a) and side (b) views of the structural skeleton of **1** (for the sake of clarity, the carbon and nitrogen atoms of the compartmental Schiff-base ligands and, also, the terminal cyano ligands were removed). Color code: terbium, yellow; copper, green; iron, orange; nitrogen, blue; oxygen, red; carbon, medium grey.

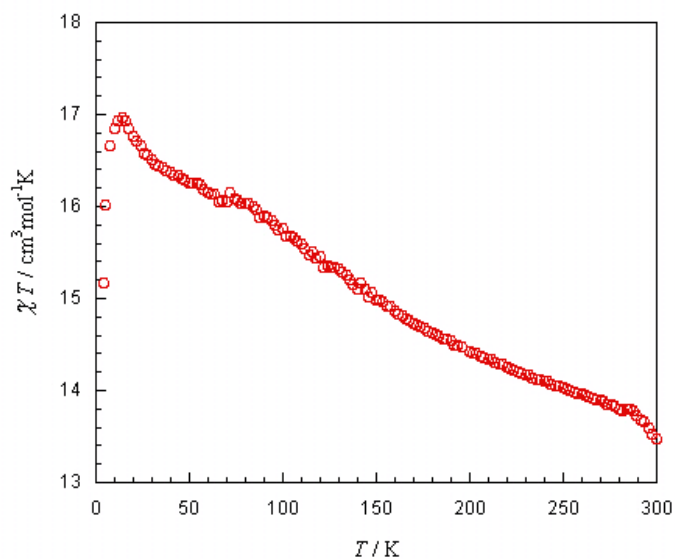

**Figure S2.** Magnetic behavior of **1** ( $\chi T$  vs.  $T$  plot). The powder of **1** was embedded in grease. However, the orientation of the strongly anisotropic crystals in the field has not been suppressed totally.

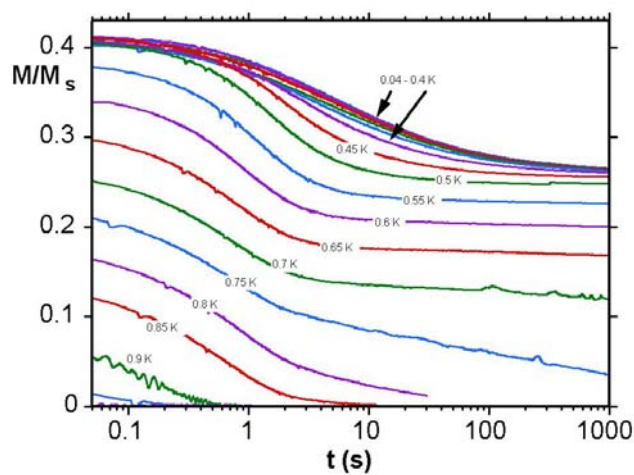

**Figure S3.** Magnetization decay measurements for **1** ( $M/M_s$  vs. time plots).
